# Supplementary material for: Music of infant-directed singing entrains infants’ social visual behavior
Source: PubMed Central journal article supplement (PMC9659341; doi:10.1073/pnas.2116967119), 2022-11-02
Supplement: pnas.2116967119.sapp.pdf [file pnas.2116967119.sapp.pdf]

1 **Supporting Information Appendix**

2  
3 **Supporting Information for**  
4 **Music of Infant-Directed Singing Entrains Infants' Social Visual Behavior**

5  
6  
7 **Authors:** Miriam D. Lense, Sarah Shultz, Corine Astésano, Warren Jones

8  
9 Correspondence and requests for materials should be addressed to [Miriam.Lense@vanderbilt.edu](mailto:Miriam.Lense@vanderbilt.edu) or  
10 [Warren.Jones@emory.edu](mailto:Warren.Jones@emory.edu)

11  
12  
13 **This PDF file includes:**

14  
15 SI Materials and Methods  
16 SI Supplementary Results  
17 Figures S1 to S5  
18 Table S1  
19 SI References  
20  
21

22  
23  
24  
25  
26  
27  
28  
29  
30  
31  
32  
33  
34  
35  
36  
37  
38  
39  
40  
41  
42  
43  
44  
45  
46  
47  
48  
49  
50  
51  
52  
53  
54  
55

## Supporting Information (SI)

|                                                                               |           |
|-------------------------------------------------------------------------------|-----------|
| <b>SI MATERIALS AND METHODS</b> .....                                         | <b>3</b>  |
| <b>PARTICIPANTS</b> .....                                                     | <b>3</b>  |
| <i>Inclusion / Exclusion Criteria</i> .....                                   | 3         |
| <i>Initial Study Cohort</i> .....                                             | 3         |
| <i>Replication Study Cohort</i> .....                                         | 4         |
| <b>EXPERIMENTAL DESIGN AND STIMULI</b> .....                                  | <b>4</b>  |
| <i>Study Design and Synchronization Terminology</i> .....                     | 4         |
| <i>Audiovisual Recordings</i> .....                                           | 5         |
| <i>Replication Set Stimuli</i> .....                                          | 6         |
| <i>Reduced Predictability Stimuli</i> .....                                   | 7         |
| <b>EXPERIMENTAL PROCEDURES AND DATA COLLECTION</b> .....                      | <b>7</b>  |
| <b>DATA PROCESSING</b> .....                                                  | <b>8</b>  |
| <i>Identification of Eye Movement Events</i> .....                            | 8         |
| <i>Calibration Accuracy</i> .....                                             | 9         |
| <i>Minimum Valid Data Criterion</i> .....                                     | 9         |
| <i>Region-of-Interest (ROI) Comparisons</i> .....                             | 9         |
| <b>DATA ANALYSIS AND STATISTICS</b> .....                                     | <b>10</b> |
| <i>Rhythmic Structure and Acoustic Parameters</i> .....                       | 10        |
| <i>Motion of Singers</i> .....                                                | 11        |
| <i>Blinking of Singers</i> .....                                              | 11        |
| <i>Emotional Expression of Singers</i> .....                                  | 12        |
| <i>Sample Size</i> .....                                                      | 13        |
| <i>Peristimulus Time Histograms</i> .....                                     | 13        |
| <i>Phase Analyses</i> .....                                                   | 15        |
| <i>Lissajous Curves</i> .....                                                 | 16        |
| <b>SI SUPPLEMENTARY RESULTS</b> .....                                         | <b>17</b> |
| <b>FIXATION TIME COMPARISONS</b> .....                                        | 17        |
| <b>LISSAJOUS CURVES: COMPARISONS OF CONTINUOUS TIME-VARYING SIGNALS</b> ..... | 18        |
| <b>CAREGIVER ACOUSTIC CUES</b> .....                                          | 19        |
| <b>CAREGIVER VISUAL CUES AND RHYTHMIC STRUCTURE</b> .....                     | 20        |
| <b>SI SUPPLEMENTARY FIGURES/TABLE</b> .....                                   | <b>24</b> |
| <b>SI REFERENCES</b> .....                                                    | <b>30</b> |

56 **SI MATERIALS AND METHODS**

57 This research was based in the Marcus Autism Center, part of Children’s Healthcare of Atlanta  
58 and the Department of Pediatrics at Emory University School of Medicine. The study protocol was  
59 approved by the Institutional Review Board of Emory University School of Medicine (00060097,  
60 00089562). Parents/legal guardians of all infant participants gave informed consent prior to participation.

61 Infants were shown audiovisual recordings of infant-directed singing. While infants viewed the  
62 recordings, their visual scanning was measured with eye-tracking equipment. In relation to the rhythmic  
63 structure of the singing, we analyzed the timing of infants’ visual fixation to singers’ eyes. Analysis of eye  
64 movements and coding of fixation data were performed with software written in MATLAB.

65 Details of participants, experimental procedures and data collection, stimuli, data processing,  
66 data analysis and statistics are provided below.

67

68 **Participants**

69 A total of 145 infants participated in the present studies, 112 in the first set of experiments (across  
70 2 age groups) and 33 in replication (all 6-month-olds), described in greater detail below.

71

72 *Inclusion / Exclusion Criteria*

73 Infants were enrolled as a representative sampling of typical development. Factors associated  
74 with increased risk of atypical development were treated as exclusionary criteria: infants were excluded if  
75 they had experienced significant pre- or perinatal complications (i.e., leading to neurological or  
76 developmental delays); if there was family history of intellectual or developmental disabilities in first  
77 degree relatives; or if there was family history of autism spectrum disorder (ASD) in first, second, or third  
78 degree relatives.

79

80 *Initial Study Cohort*

81 56 two-month-old (mean 2.7 months, SD 0.46, range 1.7-3.4 months, 43% male) and 56 six-  
82 month-old (mean 6.2 months, SD 0.38, range 5.5-7.4 months, 57% male) infants participated in the main  
83 study. An additional 20 2-month-old participants and 17 6-month-old participants enrolled but had no

84 usable eye-tracking data collected due to infant fussiness, infant falling asleep during testing, infant failing  
85 initial calibration or calibration verification (details below in Experimental Procedures and Data Collection  
86 section), or infant failing to meet minimum valid fixation data criterion (see below in Minimum Valid Data  
87 Criterion). Usable data were collected from 74% (56 of 76) of enrollees at 2-months, and from 77% (56 of  
88 73) of enrollees at 6-months.

89

#### 90 *Replication Study Cohort*

91 33 six-month-old (mean 6.2 months, SD 0.36, range 5.0-6.8 months, 52% male) infants  
92 participated in and provided usable data in the replication study. Usable data were collected from 89%  
93 (33 of 37) of enrollees.

94

### 95 **Experimental Design and Stimuli**

#### 96 *Study Design and Synchronization Terminology*

97 This study adopts synchronization terminology found in Pikovsky, Rosenblum, & Kurths, 2001 (1).  
98 We note that for specificity's sake and also to highlight that—although the current work shares common  
99 interests and common conceptual territory with studies of interpersonal synchrony (as reviewed in (2,  
100 3))—our use of the terms synchrony and synchronization is intentionally narrower than some encountered  
101 elsewhere in the literature.

102 Specifically, the current study probes synchronization defined as the *entrainment of an*  
103 *autonomous system by weak external forcing* (see chapter 3 in (1)). Here, the infant is the autonomous  
104 system (a dynamical system capable of producing its own independent actions, in this case: the infant's  
105 looking behaviors). The singing caregiver constitutes the external force (another independent,  
106 autonomous system with capacity to influence rhythms of the first). *Weak* external forcing specifies the  
107 strength of coupling between the two. If one system directly controls another, then the two essentially  
108 become one, more unified than synchronized (in the present study, weak interaction is confirmed in the  
109 infant's ability to look anywhere onscreen, at any time, or not at all). Finally, as noted in the main text, our  
110 study design focuses on entrainment of infant behavior rather than on mutual synchronization of infants  
111 and caregivers; this is a pragmatic decision to rule out effects of caregiver accommodation.

112 Use of this narrower definition is not intended as a disconnect from other examples of synchrony  
113 (as above); rather, abiding here by a narrower definition allows the behavior of human infants to be  
114 studied within a mathematical framework that is common to other studies of elemental entrainment  
115 processes (from mechanical and electrochemical coupling (1), to phase-locking of cells in a network (4),  
116 to the synchronization of animals' activity (5, 6)).

### 117 *Audiovisual Recordings*

118 Children watched audiovisual recordings of actresses singing common infant-directed songs  
119 (e.g., "Twinkle, Twinkle Little Star", "Old MacDonald"). Nine audiovisual recordings were presented, each  
120 with an average duration of 23.6 s (SD = 3.7 s; range 18.2-29.4 s). In total, the 9 audiovisual recordings  
121 comprised 227 beats (consistent with song notations). Actresses in each recording were filmed singing  
122 directly into the camera (to engage the onlooking child) in front of a background decorated like a child's  
123 room, with toys, pictures, and stuffed animals (see **Figure S1A,B**). In each video, the actress's face  
124 subtended approximately 15.8° by 12.6° of visual space (horizontal by vertical, with eyes spanning, on  
125 average, ~8.0° horizontal by ~6.9° vertical), while bodies subtended ~25.1° horizontal by ~21.7° vertical  
126 (presented, as noted above, on a display monitor approximately 24° x 32°). Five different actresses  
127 contributed to the stimulus set. Singing videos were interleaved with two other types of stimuli as part of  
128 other ongoing experiments not analyzed here (naturalistic scenes of infant-directed speech, as in (7) and  
129 scenes of other children at play (8)).

130 Videos were 640 x 480 pixels in resolution, presented full-screen on a 20-inch computer monitor  
131 (refresh rate 60 Hz noninterlaced) at 30 frames per second. Audio (44.1 kHz) was presented in mono-  
132 channel. All videos were sound and luminosity equalized, and have been piloted and used successfully in  
133 other published studies of infant social engagement (7, 8).  
134

135 Actresses were non-professional singers, with naturally-occurring variation in tempo, amplitude,  
136 and tone, instructed to sing as if they were engaging with an infant: the average inter-beat interval across  
137 all songs (strong/weak beat metric structure) was 434 ms (SD=112 ms) (138 beats per minute); the  
138 average coefficient of variation was 12.7% (SD=1.9%).

139 We used audiovisual recordings of infant-directed singing to create an explicit, *unidirectional* test  
140 of infant entrainment: while coordination of actual infant-caregiver interaction is, of course, bidirectional(9,  
141 10), in our experimental design, infant behavior could have no effect on caregivers (the audiovisual  
142 recordings); if the two became synchronized, the effect would necessarily be due to infant entrainment to  
143 caregiver cueing (rather than caregiver accommodation). This experimental design is critical for this initial  
144 investigation of infant entrainment and lays the groundwork for future studies of mutual entrainment.  
145 However, we note that more complex mathematical techniques will need to be employed when  
146 investigating dynamic, bidirectionally coupled systems, especially in light of potential confounds of a  
147 conscious, accommodating partner (e.g., as demonstrated in more simplified systems in (11–13)); this  
148 mutual entrainment of caregiver and infant behaviors that can be either automatic/reflexive or  
149 volitional/consciously controlled, are different than those encountered when measuring phase-locking of  
150 two signals not under conscious control (such as EEG).

#### 151 152 *Replication Set Stimuli*

153 For replication, as in the original experiment, children watched audiovisual recordings of  
154 actresses singing common infant-directed songs. In replication, children watched 4 recordings with a  
155 mean duration of 21.0 s (SD=4.8 s; range 14.9-26.7 s). Fewer recordings were used in replication than in  
156 the original experiment due to inclusion of an additional experimental comparison (see below). The  
157 average inter-beat interval across replication stimuli was 488 ms (SD=119 ms) (123 beats per minute);  
158 the average coefficient of variation was 13.2% (SD=1.0%). As in the original experiment, replication set  
159 stimuli were interleaved with two other types of stimuli as part of ongoing experiments not analyzed here  
160 (naturalistic scenes of infant-directed speech, as in (7), and scenes of other children at play (8)).

161 In addition, replication set videos were interleaved with reduced predictability stimuli (see next  
162 section below). The experimental design decision to use fewer audiovisual recordings to test for  
163 replication (4 rather than 9) was made to allow for additional data collection time to test effects of reduced  
164 predictability: because replication of the original entrainment finding is a necessary prerequisite to  
165 meaningfully disrupt it, we needed to present both original waveform videos (for replication of the main  
166 finding) and reduced predictability stimuli (for the new experiment). Consequently, within the same total

167 duration of viable testing time for infants, half of the videos presented in replication were original  
168 (unmanipulated) audiovisual recordings and half were reduced predictability stimuli.

### 170 *Reduced Predictability Stimuli*

171 To test whether entrainment in infant eye-looking does or does not depend upon rhythmic  
172 predictability of caregiver cueing, we experimentally manipulated original audiovisual recordings to make  
173 jittered versions of each recording, resulting in reduced rhythmic predictability. Specifically, we re-  
174 sampled the original audiovisual recordings—which had naturally varying but predictable inter-beat  
175 intervals—to instead reduce their predictability: in each song, two-thirds of the inter-beat intervals were  
176 randomly varied by +/-30% of their original duration, disrupting the original rhythmic structure and  
177 reducing beat-to-beat predictability (main text **Figure 4**). The manipulation of inter-beat intervals in  
178 audiovisual stimuli was accomplished via granular resynthesis in Ableton Live, simultaneously warping  
179 audio and visual signal to ensure fully synchronous audiovisual stimuli. Jittered versions had mean  
180 duration of 20.8 s (SD=4.7 s, range 15.4-26.7 s). The average inter-beat interval was 492 ms (SD=118  
181 ms) (122 beats per minute); the average coefficient of variation was 28.4% (SD=5.5%).

182 It is worth noting that the reduced predictability stimuli, while designed and implemented by  
183 means of changes in beat predictability, also provide strong experimental controls for both simple motion  
184 effects and for caregiver visual cueing, as the overall motion and visual facial cueing of the caregiver are  
185 preserved in the reduced predictability stimuli: i.e., the same range of head and facial motion and all  
186 affective cues are preserved and presented, while only their relative temporal predictability is  
187 manipulated. Stated differently, the reduced predictability stimuli present the same range in rigid head  
188 motion, range in facial feature motion, and range of facial expressions (all in the same spatial locations),  
189 as in the original audiovisual recordings, but the predictability in timing of when those events occur is  
190 disrupted.

### 192 **Experimental Procedures and Data Collection**

193 Data collection procedures matched those reported in (7). Infants sat in a reclined bassinet  
194 mounted on a table that was raised or lowered to ensure standardized position of infants' eyes relative to

195 the display monitor (28 inches diagonally, subtending an approximately 24° x 32° portion of the infants'  
196 visual field). Lights in the room were dimmed. A parent or primary caregiver accompanied the infant at all  
197 times but both the parent and experimenter were out of the infant's view during data collection.  
198 Experimenters monitored infants via the eye-tracking camera and a second video camera that displayed  
199 a full-face view of the infant. Sessions were stopped before a child completed watching all stimuli if the  
200 infant fell asleep or became too fussy to watch the videos. Eye-tracking cameras and an infrared light  
201 source were concealed within a teleprompter that displayed the videos while audio was played through  
202 speakers mounted at equidistant locations 3" to the left and right of the monitor. Eye-tracking was  
203 accomplished by a video-based, dark pupil/corneal reflection technique with hardware and software  
204 created by ISCAN, Inc. (Woburn, MA, USA), with data collected at 60 Hz.

205 Data collection began by presenting soothing but engaging videos to acclimate the child to the  
206 testing set-up (e.g., *Baby Mozart*). When the infant was attentive, a 5-point calibration scheme was  
207 presented utilizing audiovisual stimuli (spinning and/or flashing lights, cartoon animations, together with  
208 accompanying sounds). Calibration stimuli began as large targets ( $\geq 10^\circ$  in horizontal and vertical  
209 dimensions) which then shrank (via animation) to their final size of 1° to 1.5° of visual angle. The  
210 calibration routine was followed by verification of calibration in which more calibration targets were  
211 presented at any of nine on-screen locations. Throughout the remainder of the testing session, calibration  
212 targets were shown between experimental videos to measure possible drift in accuracy. After calibration  
213 checks, the system was re-calibrated if excessive drift ( $>3^\circ$  of visual angle) in calibration accuracy  
214 occurred. Please see Data Processing: *Calibration Accuracy* below for measures of calibration accuracy.

## 216 **Data Processing**

### 217 *Identification of Eye Movement Events*

218 Analysis of eye movements and coding of fixation data were performed with software written in  
219 MATLAB (MathWorks). The first phase of analysis was an automated identification of non-fixation data  
220 comprising blinks, saccades and any missing data or fixations directed away from the presentation  
221 screen. Saccades were identified by eye velocity using a threshold of 30° per sec (14). We tested the  
222 velocity threshold with the 60-Hz eye-tracking system described above and, separately, with an eye-



223 tracking system collecting data at 500Hz (SensoMotoric Instruments GmbH). In both cases saccades  
224 were identified with equivalent reliability as compared with both hand coding of the raw eye-position data  
225 and with high-speed video of the child's eyes. Blinks were identified as described in (15). Missing data  
226 and off-screen fixations (when a participant looked away from the video) were identified either by missing  
227 values in gaze vector data or by gaze vectors directed to locations beyond the stimuli presentation  
228 monitor.

229

### 230 *Calibration Accuracy*

231 Average calibration accuracy for all groups was less than 1° of visual angle. **Figure S1C,D** shows  
232 total variance in calibration accuracy, and **Figure S1E,F** shows average calibration accuracy. Calibration  
233 accuracy did not differ significantly between age groups (**Figure S1E,F**).

234

### 235 *Minimum Valid Data Criterion*

236 For each audiovisual recording, we used a minimum-valid-data criterion of fixation time greater  
237 than or equal to 20% of total recording duration, as in (8). We set no thresholds for either minimum  
238 number of audiovisual recordings nor minimum number of beat trials sufficient for inclusion of an infant's  
239 data in analyses; if usable data were collected, with a given audiovisual recording fixated at a level  
240 greater than or equal to the minimum-valid criterion noted, then the infant's data were included. Of 9  
241 possible audiovisual recordings (main experiment), the mean number included for 2-mo-olds was 4.3(1.5)  
242 and for 6-mo-olds was 5(2.5) (data given as mean(SD)),  $t_{110}=1.71$ ,  $p=0.09$ ). Mean number of beat trials  
243 per child at 2 months was 96.9 (38.0) (mean(SD)) and at 6 months was 105.3(55.9) ( $t_{110}=0.92$ ,  $p=0.36$ )  
244 (**Figure S1G**).

245

### 246 *Region-of-Interest (ROI) Comparisons*

247 Eye movements identified as fixations were coded into four regions of interest (ROIs) that were  
248 defined within each frame of all video stimuli as shown in **Figure S1A,B**: eyes (our primary dependent  
249 variable in the current study), as well as mouth, body (neck, shoulders and contours around eyes and  
250 mouth, such as hair) and objects (surrounding inanimate stimuli). The regions of interest were hand

251 traced for all frames of each video and stored as binary bitmaps. Automated coding of fixation time to  
252 each region of interest then consisted of a numerical comparison of each infant's coordinate fixation  
253 location data with the bitmapped regions of interest. From the eye-tracking data, we determined  
254 proportion of time spent attending to the video (**Figure S1H**) as well as proportion of time spent fixating  
255 on the eye region (**Figure S1I**).

256

## 257 **Data Analysis and Statistics**

### 258 *Rhythmic Structure and Acoustic Parameters*

259 We quantified the rhythmic structure of each song by coding vowel durations of all notes in strong  
260 metrical positions (i.e., the underlined vowels in '*Twinkle twinkle little star...*'), similar to prior studies of  
261 infant-directed song (16, 17). Coding was accomplished by visualization of each speech waveform and  
262 spectrogram, as well as by interactive playback (16–19), by two trained and experienced coders,  
263 including an expert phonetician, who reviewed and confirmed all codings. Using time stamps from the  
264 audio codings of vowel onsets and offsets, we generated frame-by-frame binary time series indicating  
265 whether or not corresponding video frames aligned in time with vowels in metrically strong positions  
266 (termed 'beats' for brevity). We used vowel durations (rather than only onsets) to quantify rhythmic  
267 structure because meaningful social communication requires elapsed time (i.e., the passage of an  
268 experiential span of sufficient duration to enable communication transfer).

269 We also considered other acoustic cues related to rhythmic structure. The rhythmic structure of  
270 infant-directed singing necessarily involves multiple inter-related prosodic parameters, including variation  
271 in parameters such as pitch and loudness (16). These parameters could play a role in modulating infants'  
272 visual attention. We quantified these parameters as follows in order to measure their relationship to infant  
273 looking: Acoustic measures of pitch and loudness were calculated as mean fundamental frequency (Hz;  
274 proxy for perceived pitch) (20) and root-mean-square amplitude (proxy for perceived loudness)(21),  
275 respectively, in time intervals equivalent to the duration of each video frame (i.e., in 33.3 ms bins). For  
276 each video, time intervals with fundamental frequency or amplitude values greater than the 90<sup>th</sup> percentile  
277 were used to define time series of "high" frequency or amplitude. As noted in the main text (**Figure 2**),  
278 neither high frequency nor high amplitude alone was sufficient in and of itself to drive synchronous infant

279 eye-looking. To assure that results were not dependent upon threshold selection (90<sup>th</sup> versus other  
280 percentiles), follow-up analyses were conducted with varying thresholds (95<sup>th</sup>, 92<sup>nd</sup>, 88<sup>th</sup>, 85<sup>th</sup>, 80<sup>th</sup>  
281 percentiles) and yielded consistent results across all comparisons. Note that in infant-directed song,  
282 frequency is influenced by the melody of the song; this is in contrast to infant-directed speech, which  
283 employs pitch accents for communicative emphasis (22). Amplitude, however, is related to rhythmic  
284 structure (16) but also reflects the variable volume (i.e., musical dynamics) used during expressive  
285 singing. The goal of the comparative analyses of the effects of different parameters was to test the extent  
286 to which discrete occurrences thereof offer evidence for which parameters play a greater (beat) or lesser  
287 (any high frequency, high amplitude) role in driving synchronous responding.

288

### 289 *Motion of Singers*

290 Motion of the singers was quantified in two ways for two different kinds of motion: motion of the  
291 internal features of the face, and rigid motion of the head. To quantify motion of the internal features of  
292 the face, we calculated the absolute difference in image intensity (luminance) per video pixel over time.  
293 Change in intensity was summed for all pixels in the eyes region-of-interest (ROI) to provide a metric of  
294 change within the eye region. We then identified frames with values less than the 10<sup>th</sup> percentile to define  
295 a time series of low motion (i.e., periods relatively free from motion in the eye region). We were interested  
296 in periods of low motion as they represent relative stilling. As before, to assure that results were not  
297 dependent upon threshold selection, we repeated analyses with additional thresholds (5<sup>th</sup>, 15<sup>th</sup>, 20<sup>th</sup>);  
298 results across varying thresholds were consistent with those presented in **Figure 3**.

299 To quantify rigid motion of the head, we tracked the (x,y) location in video pixel coordinates of the  
300 tip of the nose through all frames of all videos. With these data, we could measure up-and-down and  
301 side-to-side motion of the head, in relation to the beat and in relation to infant eye-looking. Not  
302 surprisingly, up-and-down movements of the head are synchronized with the beat (we found no  
303 significant side-to-side head motion versus beat synchrony). Notably, however, increase in infant eye-  
304 looking precedes the up-and-down motion of the head, indicating anticipatory looking behavior.

305

### 306 *Blinking of Singers*

307 Blinks of the singing actresses were coded manually from each video using frame-by-frame  
308 inspection. Timing of blink on- and offsets were coded based on coder's observation of occlusion of the  
309 singer's pupils. All blinks were determined by two independent coders, with >99% agreement. Frame-by-  
310 frame binary time series were then created to indicate whether or not each video frame aligned in time  
311 with a singer's blinking.

312

### 313 *Emotional Expression of Singers*

314 In general, when singing to infants, caregivers display positive affect and smiles (23, 24). In our  
315 analyses, we were most interested in changing facial expressions reflecting (a) varying levels of caregiver  
316 communicative content and (b) varying levels of caregiver engagement, both of which will impact what  
317 and how a caregiver conveys information and may also impact infants' attention to a singing caregiver's  
318 eyes.

319 To quantify emotional expressions in the faces of singing caregivers, we used IntraFace software  
320 (25). In brief, IntraFace uses feature tracking in videos of faces (via a "Supervised Descent Method" (26))  
321 to track points on a face, and then, based on the positions of those points, quantifies the activity of facial  
322 action units (accomplished by an inductive machine learning approach dubbed a "Selective Transfer  
323 Machine") to categorize the resultant patterns into generic facial expressions. The result is a  
324 quantification of facial action unit activity and a probability rating of emotional expression for every frame  
325 of video. [Note: When these analyses were conducted, Intraface Software was freely available for  
326 research use; it was subsequently acquired by Facebook and is no longer publicly available. OpenFace is  
327 a comparable package that can be found at <https://cmusatyalab.github.io/openface/> .]

328 Analyses focused on variation in two facial expressions: neutral, which involves relaxed  
329 eyes/brows (the absence of facial action unit activity; IntraFace's "neutral" classification), and "mock-  
330 surprise"/wide-eyed engagement, which involves raising of the upper eyelids and brows (action units 1, 2,  
331 5; IntraFace's "surprised" classification). The "surprised" classification from IntraFace is consistent with  
332 the canonical expression of surprise in adults but also with an expression called "mock-surprise" or the  
333 "wow" expression that commonly occurs in infant-directed communication (27, 28). This infant-directed  
334 mock-surprise involves raised eye action units (wide open eyes, raised eyebrows) and open mouth, and

335 is rated as expressing surprise, excitement, and interest by naïve raters (28). It is worth noting that mock-  
336 surprise, despite being extremely common in caregiver-infant interaction (29, 30), and immediately known  
337 to most parents and caregivers, is rarely mentioned in the adult facial expression literature (31): rather,  
338 mock-surprise exists specifically within the developmental context of infant-caregiver interaction (one of  
339 multiple such acts that emerge and exist specifically within the context of dyadic interaction with infants  
340 (30)).

341 To test whether IntraFace facial expression classifications were consistent with human observer  
342 perceptions, 10 naïve adults rated the emotional expressions of video frames pseudo-randomly selected  
343 from all videos (selected pseudo-randomly to ensure a variety of expressions; 36 ratings for each of 10  
344 coders). Frames classified as “surprised” by IntraFace were consistently rated as higher in surprise, wide-  
345 eyed engagement, excitement, and interest than non-surprised frames ( $t(349)'s \geq 6.44$ ,  $p's < 0.001$ ),  
346 confirming the reliability of the software’s surprise classification.

347 For each video, Intraface ratings were used to define frame-by-frame time series indicating  
348 presence or absence of the expression of interest (either neutral expression or wide-eyed engagement).

### 349 *Sample Size*

351 For determining sample size in the present study, power calculations were based on data from  
352 the existing literature on infant eye-looking(7) (including expected frequency and duration of eye-looking)  
353 and on the expected observable effect size modeled as the strength of observable association between  
354 caregiver action and hypothesized infant eye-looking response (correlation between inter-onset intervals  
355 of action and response). Analyses indicated that samples of 50 or greater would provide 80% power to  
356 detect effects with magnitude equal to approximately 0.34 ( $\alpha = 0.05$ ). Measurement estimates of our  
357 achieved power ( $1-\beta$  error probability) for 2-mo-old entrained eye-looking was 0.86; in 6-mo-olds,  
358 achieved power for entrained eye-looking was 0.99. Given the large effect size observed in 6-mo-olds in  
359 the original experiment, in our replication study (**Figure S5** and **Figure 4**), we relaxed the sample size  
360 required to  $N = 30$  or greater.

### 361 *Peristimulus Time Histograms*

363 Peristimulus time histograms (PSTHs) were used to determine timing of fixations to the eyes  
364 relative to timing of the stimulus events of interest (i.e., to beats (vowels aligned with strong metrical  
365 positions), acoustic parameters, facial expressions) following the methods detailed in (15). Repeated here  
366 in brief, PSTHs were constructed by aligning individual binary time-series data for each infant's fixations  
367 to the eye ROI (0 = not fixating on eye ROI; 1 = fixation on eye ROI) with the binary time series for the  
368 relevant stimulus event (0 = not stimulus event; 1 = stimulus event). We counted fixations to the eye  
369 region in 33.3-ms bins in a window from -433.3 to +433.3 ms around the stimulus event. Bin counts were  
370 totaled across all events and for each infant and then averaged for group means at 2 and 6 months of  
371 age.

372 We used permutation testing to examine if change in eye looking synchronized to the stimulus  
373 event differed from change expected by chance. Binary times series for each infant were permuted by  
374 circularly shifting the time series by a random number for 1000 iterations. This approach preserves overall  
375 frequency and duration of fixations to the eye ROI for each infant but makes the fixations random with  
376 respect to the time course of the stimulus events of interest and to other infants' fixations. The mean of  
377 the permuted data represents chance-level fixation data relative to the stimulus event. We compared  
378 actual fixation data against the 95<sup>th</sup> percentile of the permuted data to test for significant increases (one-  
379 sided test,  $\alpha=0.05$ ) in eye-looking time-locked to the stimulus event of interest in the singing (e.g., beats,  
380 high frequency, high amplitude, emotional expression, etc.). This same approach was taken to assess  
381 time-locking of acoustic (high frequency, high amplitude) and visual (low motion, blinks, emotional  
382 expression) prosodic markers of the infant-directed singing at the beats, using time-series of the relevant  
383 prosodic marker (0 = no prosodic marker; 1 = prosodic marker) relative to time-series of the rhythmic  
384 structure (0 = no beat; 1 = beat).

385 To examine whether PSTH magnitude and shape were significantly greater for 6-month-old versus  
386 2-month-old infants, we again used permutation testing. In 10,000 random re-samplings, we repeatedly  
387 created two groups of independent infants, randomly selected across all 6-month-old and 2-month-olds,  
388 and then computed their between-group difference in PSTHs. The mean difference across all 10,000  
389 permuted samples represents chance-level difference at each time point. We then compared the actual  
390 observed 6- versus 2-month between-group PSTH difference against the 95<sup>th</sup> percentile of PSTH

391 differences expected by chance alone (one-sided test,  $\alpha=0.05$ ). That comparison enabled us to test  
392 whether time-locked eye-looking at 6 months was significantly greater than at 2 months.

393

### 394 *Phase Analyses*

395 To estimate each infant's phase of response,  $\phi$ , at the beat, each infant's PSTH data were first  
396 fitted with each of 3 models (fitting via nonlinear least squares method). The data were fitted with a simple  
397 linear function (1<sup>st</sup> degree polynomial,  $y = ax + b$ ), with a cosine function ( $y = \cos(ax + b)$ ), and with a  
398 cosine function with additive linear trend ( $y = \cos(ax + b) + cx + d$ ) (with, in each case,  $y$  denoting an  
399 individual's level of response,  $x$  denoting time, and  $a$ ,  $b$ ,  $c$ , and  $d$  denoting coefficients of the respective  
400 fitted function). Among the three fits, the best-fitting function was selected by goodness-of-fit statistic ( $R^2$   
401 coefficient of determination).

402 When comparing results from each of the three fits, to be conservative in our analyses, we  
403 interpreted cases in which the simple linear fit (1<sup>st</sup> degree polynomial) produced the highest goodness-of-  
404 fit statistic as indicating that there was no reliable evidence of a phasic response for that infant in a given  
405 condition. Stated simply: if the data were best fit by a straight line, there was no reliable statistical  
406 evidence for phasic response. With no reliable evidence of a phasic response, that infant's data were  
407 excluded from further phase analyses for that condition (number of exclusions reported in

408 **Supplementary Table 1**). Note that exclusion from individual phase estimation occurred in only 1.75  
409 infants per condition (mean(SD) = 1.75(1.4)), and only affected phase estimation analyses and plots for  
410 that individual infant for that condition; no other conditions or analyses were affected, and group metrics  
411 and group PSTHs in all conditions include data from all infants. As seen in **Supplementary Table 1**,  
412 goodness of fit statistics for phase analyses were very high across all conditions ( $R^2 > 0.81$  in all  
413 conditions), with the vast majority of infants' data fitted successfully with a cosine function and only a  
414 small number (no more than 4 infants in any condition) with no statistical evidence for phasic response.

415 In cases when individual children's data were better fit with a cosine function (when there was  
416 evidence of individual phasic response for a given child for a given condition), then that infant's phase of  
417 response at the beat,  $\phi$ , was calculated as the local maximum closest in time to 0, obtained by solving for  
418 zero on the first derivative of the fitted function:  $\phi = -b/a$  (for  $y = \cos(ax + b)$  as the best fitting

419 function) or  $\phi = (\arcsin(c/a) - b)/a$  (for  $y = \cos(ax + b) + cx + d$  as the best fitting function). These  
420 individual infant  $\phi$  estimates are plotted as inset graphs in Figures 2-4, S3-S5.

421 To analyze distributions in  $\phi$  estimates, we used circular statistics. We assessed synchronization  
422 of eye-looking response with the beat using the V-test, testing for non-uniformity of  $\phi$  distributions around  
423 0 (32, 33). To compare tightness of phase-locking between the two- and six-month groups (i.e.,  
424 consistency of response among individuals), we used the Wallraff test of angular dispersion (32, 34).

425

### 426 *Lissajous Curves*

427 As a complementary method for observing synchronization between the beat of infant-directed  
428 singing and the looking behavior of infants, we constructed Lissajous curves comparing the changing  
429 phase of the beat with the varying probability of infant-looking behavior. Lissajous curves provide a direct  
430 record of how two time-varying signals vary in relation to one another, and Lissajous curves can be used  
431 to visualize synchronization between two continuous signals, to quantify phase shift from one signal to  
432 another, and to identify higher order synchronization (e.g., 2:1, 3:1, ... n:m frequency coupling) (**Figure**  
433 **1L**).

434 In these analyses, the phase of the beat was estimated as a continuously varying cosine function  
435 as plotted in **Figure 1D**. As noted in the main text and described above in “Rhythmic Structure and  
436 Acoustic Parameters” section, beats were coded and quantified as the vowel durations of all metrically  
437 strong syllables within each song. With manually-labeled beats in all songs, the corresponding cosine  
438 function was calculated to reach a local maximum at the midpoint of each labeled beat and to reach a  
439 local minimum value at the midpoint of each between-beat interval.

440 To quantify probability of infant-looking behavior, the probability of a given behavior was defined  
441 as the number of infants performing that behavior (numerator) divided by the total number of infants who  
442 could have been performing that behavior (denominator): for example, probability of infant eye-looking  
443 equaled the number of infants looking at a singer’s eyes divided by the total number of infants who could  
444 have been looking at a singer’s eyes. That quantification was repeated at each moment (sample) in the  
445 time series to quantify time-varying probability of infant behavior for the entire time series in all  
446 audiovisual recordings. To smooth the data and normalize for global variance in number of infant viewers,



447 we computed two filtered versions of each behavioral time series: one filtered with a moving-average  
448 square window of 12 samples (local window, corresponding to 400 ms of the time series, for low pass  
449 filtering), and a second with a square window of 60 samples (global window, corresponding to 2 sec of  
450 the time series, for high pass filtering). We then subtracted the signal filtered at the local window from the  
451 signal filtered at the global window, normalizing for global variance in intensity while preserving local  
452 signal change(35). Finally, the local and globally filtered signal was standardized to have the same mean  
453 and variance as the original (unfiltered) signal.

454 With that measure of time-varying probability of infant-looking behavior, together with the cosine  
455 function specifying phase of the beat across all songs, we were left with two continuous time-varying  
456 signals that could be directly compared by plotting as Lissajous curves. Paradigmatic examples of non-  
457 synchronous and synchronous relationships between 2 signals are plotted in **Figure 1L**.

## 458 **SI SUPPLEMENTARY RESULTS**

### 459 **Fixation Time Comparisons**

460 As noted above in the Data Acquisition and Processing section, although our primary dependent  
461 variable was fixation on caregivers' eyes, infant eye movements identified as fixations were coded into  
462 four regions of interest defined within each frame of all video stimuli: eyes, mouth, body (neck, shoulders  
463 and contours around eyes and mouth, such as hair) and objects (surrounding inanimate stimuli) (**Figure**  
464 **S1A,B**).

465 Infants at both ages had similar proportions of overall time spent fixating (mean(SD) at 2-mos:  
466 59.4%(16.4); 6-mos: 63.7%(13.5);  $t_{110}=1.50$ ,  $p=0.14$ ) (**Figure S1H**), as well as proportion of time spent  
467 fixating on the eyes (2-mos: 31.3%(22.6); 6-mos: 31.6%(19.2);  $t_{110}=0.06$ ,  $p=0.95$ ) (**Figure S1I**). There  
468 were no significant differences in proportion of time spent in eye-looking between the two age groups.  
469 That absence of significant differences contrasts somewhat with results from our earlier work (7), in which  
470 we observed an increase in eye-looking between 2- and 6-mo-old males followed longitudinally. Notably,  
471 however, the current comparisons differ in 3 ways from those prior results. First, the results here are for  
472 infant-directed singing, not speech. Second, the results here are for independent-sample, between-  
473 subjects, cross-sectional comparison of means rather than a longitudinal within-subjects comparison of  
474 developmental change. And third, the current sample includes both males and females rather than males

475 alone in (7), and when followed longitudinally, females increase their eye-looking more rapidly than  
476 males, from 2 until ~4 months, before then decreasing slightly from ~4 to 6 months; in contrast, males  
477 increase looking more slowly from 2 until 6 months, as in (7).

478

#### 479 **Lissajous Curves: Comparisons of Continuous Time-Varying Signals**

480 Complementary analyses of synchronization compared continuously-varying measures of the  
481 changing phase of the beat with continuously-varying probability of infant-looking behavior by  
482 constructing Lissajous curves (**Figure S2**).

483 Beginning with the 6-month data, as shown in **Figure S2C**, the resulting Lissajous curves, like the  
484 main text PSTH analyses, show evidence of synchronization between infant eye-looking and the beat of  
485 infant-directed singing: probability of 6-month-old infant eye-looking increases in synchrony with the beat,  
486 with 1:1 synchrony and phase shift of  $\sim\pi/5.5$  (phase shift = 0.5669; eye-looking probability is maximally  
487 increased slightly after the beat, as shown in the time-/direction-annotated traces at right of panel **Figure**  
488 **S2C**). Probability of mouth-looking (**Figure S2E**) also shows 1:1 synchrony with similar phase shift  
489 ( $\sim\pi/5.5$ , 0.5729), but is synchronous in anti-phase, maximally reduced after the beat. Variation in  
490 probability of 6-month-old body-looking (**Figure S2G**) shows no evidence of synchrony: probability of  
491 body-looking does not vary systematically in relation to the beat. Saccades, by contrast, are synchronized  
492 at 2 saccade periods per 1 beat period, with maximum increase just prior to the beat (**Figure S2I**),  
493 indicating an increase in saccades occurring in anticipation of the beat (phase shift ahead of the beat by  $\sim$   
494  $-\pi/10.3$ , phase shift = -0.3055)).

495 Lissajous curves for 2-month-olds show similar but developmentally attenuated synchronization.  
496 Similar to 6-month-olds, probability of 2-month-old infant eye-looking increases in synchrony with the beat  
497 (**Figure S2B**), with 1:1 synchrony and phase shift of  $\sim\pi/4.8$  (phase shift = 0.6500). Mouth-looking also  
498 shows 1:1 synchrony in anti-phase (**Figure S2D**), maximally reduced prior to the beat, but is more phase-  
499 shifted in 2- than 6-month-olds:  $\sim\pi/2.97$  vs  $\sim\pi/5.5$ , respectively. As with 6-month-olds, variation in  
500 probability of 2-month-old body-looking does not vary significantly with the beat (**Figure S2F**). Finally, the  
501 Lissajous curve for 2-month-old saccade probability appears to show early developmental transition

502 towards 2 saccades per 1 beat period, but only weakly so, approaching ~2:1 coupling and phase-shifted  
503 by  $\sim \pi/2.82$  (**Figure S2H**).

504 All Lissajous curves plotted in **Figure S2B-I** show average probability across all beat trials, with  
505 variance in beat-by-beat response indicated by gray shading, which shows +/-1 standard error of the  
506 mean.

507

## 508 **Caregiver Acoustic Cues**

509 Infant-directed communication is well-known for its properties of heightened fundamental  
510 frequency, greater pitch contours and variability, longer pauses, slower tempo, and increased  
511 repetition(16, 22, 36). Prior research indicates that these acoustic features of infant-directed  
512 communication capture and maintain infants' attention (e.g., high fundamental frequency, (22, 37)).  
513 However, when we specifically examine moment-by-moment drivers of infant visual attention to the eyes  
514 of an engaging caregiver, infant eye-looking was time-locked to the rhythmic structure (beats) but was not  
515 significantly time-locked to moments of high frequency or high amplitude (main text **Figure 2**). These  
516 results are not in contradiction with the general importance of pitch and loudness in infant-directed  
517 communication; rather, they offer evidence that during infant-directed singing, rhythm organizes those  
518 and other features. The lack of time-locked looking to high amplitude or frequency events may be due to  
519 the context of infant-directed song. During song, the singer's use of volume for expressiveness (i.e.,  
520 musical dynamics) impacts amplitude levels while melodic contours dictate frequency patterns. Individual  
521 notes also exhibit greater pitch stability in infant-directed singing compared to infant-directed speech (38,  
522 39). Thus the use of specific acoustic parameters in song contrasts with the role of pitch accents in  
523 contributing to rhythmic structure during infant-directed speech, during which high pitch and pitch  
524 variability capture infants' attention (40, 41). The global prosodic frequency and amplitude contours of  
525 song may have rendered these specific acoustic cues less relevant for dynamically modulating infants'  
526 eye gaze on a moment-by-moment basis. Even while cues such as high frequency are important for  
527 attracting infants' overall attention, including during infant-directed singing (22, 37), the precise timing of  
528 infants' attentional allocation to a singing caregiver's eyes is more strongly influenced by rhythm than by  
529 other acoustic cues. Previous studies of non-infant-directed singing (e.g., professional or layperson

530 singing performances directed toward other adults) indicate that when acoustic cues are constrained due  
531 to the musical/singing context (e.g., by melodic contour), they may be less informative for socio-  
532 communicative judgments: when pitch level is controlled, naïve observers are less accurate at identifying  
533 specific emotions in audio-only versions of singing versus visual-only or audiovisual versions (42) and the  
534 identified emotions are also perceived less intensely in audio-only formats (43). Additionally, as rhythm  
535 and other acoustic elements (e.g., pitch) are intertwined for the listener during song perception (44–47),  
536 the temporal organization provided by the beat-based rhythmic structure constrains pitch and melody  
537 perception: rhythmically shifting a song so that specific pitches are or are not aligned with the beats  
538 changes the perceived tonality and reduces recognition of pitches (even if the pitches themselves are  
539 unchanged (44, 45)). This is consistent with rhythm as a temporal organizer of listeners' experiences:  
540 rhythm plays an important role in structuring and scaffolding experience when engaged with song.

541 All stimuli in the current study were common children's songs performed in an infant-directed  
542 manner (i.e., higher fundamental frequency) to be developmentally appropriate for our sample and  
543 research questions. Future studies could use specifically constructed melodies performed at multiple  
544 different pitch levels to further examine effects of high frequency when controlling for the rhythmic  
545 structure in which frequency is embedded.

546

### 547 **Caregiver Visual Cues and Rhythmic Structure**

548 Rhythm is a salient cue to infants because it is expressed amodally (48, 49). As demonstrated in  
549 current data in main text **Figure 3**, caregivers unconsciously structure their own visual cueing in time to  
550 the rhythm of their singing, redundantly and repeatedly highlighting infant-relevant communicative cues.  
551 Because caregivers use these cues to engage their infants socially, especially during infant-directed  
552 singing, a key question is whether these cues drive infant behavioral response independently (i.e., are  
553 sufficient on their own), or if infant response relies on or benefits from the redundant, repeated structure  
554 provided by rhythm and entrainment (in order to ultimately, most effectively engage infant behavior). A  
555 related question is how this confluence of cueing affects multimodal social information transfer  
556 developmentally, to support children's social adaptive learning over time.

557           A way to probe each of these questions is to test the extent to which infant responses vary as a  
558 function of different components of caregiver cueing and the extent to which responses vary  
559 developmentally. We hypothesized that by imposing a structure to the interaction, rhythm may support  
560 other cueing signals by enabling predictable and repeated presentation of multimodal social information,  
561 and that these effects should strengthen over developmental time.

562           To test, we compared entrainment of infant eye-looking during the following conditions: during all  
563 beats; during beats *without* co-occurring wide-eyed, positive affect, and during beats *with* co-occurring  
564 wide-eyed, positive affect (**Figure S3**). In both 2- and 6-month-old infants, entrainment is evident during  
565 all beats (**Figure S3A,D**, results repeated from **Figure 2A,B**). However, a developmental progression is  
566 apparent when we separate instances when beats either co-occur or not with a caregiver's presentation  
567 of wide-eyed, positive affect: at 2 months, entrainment is driven by the beats, with no effect for co-  
568 occurring presentation of wide-eyed, positive affect (**Figure S3B,C**); at 6 months, however, the timing of  
569 infant looking is aligned with the beat but also potentiated by a caregiver's presentation of co-occurring  
570 wide-eyed, positive affect (**Figure S3E,F**). With development, precise time-alignment of eye-looking  
571 behavior is supported by the rhythmic structure of multiple redundant cues.

572           While these findings in 2-month infants may seem surprising, closer inspection of individual  
573 phase responses provides some indication of why this may be. As depicted in **Figure S3A**, while 2-  
574 month-olds entrain to the beat, there is also variability in infants' precise individual response timing, with  
575 some 2-month-olds aligning just prior to, and others just after, the beat. This variability is consistent with  
576 the increased variability in latencies to saccade onset observed in control comparisons between 2- and 6-  
577 month-olds (**Figure S1K**), and would be consistent with less mature motor control in 2-month-olds. By  
578 comparison, individual 6-month-olds are less variable in their individual time alignment with the beat  
579 (**Figure S3D**). We can then compare the slightly increased variability in 2-month-old response with the  
580 time-alignment of caregivers' wide-eyed positive affect (also in relation to the beat; i.e., comparing time-  
581 alignment of infant response to the beat versus time-alignment of caregiver behavior to the beat). Time  
582 alignment of caregiver wide-eyed positive affect with the beat (main text **Figure 3A**) is much more  
583 precise, tightly aligning with or just prior to the beat. We think it likely that the slightly increased individual

584 variability in 2-month-old time-aligned eye-looking, coupled with the precise time-alignment of caregivers'  
585 own synchronized expressions, leads to the pattern of observed results.

586 This developmental progression, aided by infants' maturing oculomotor function, suggests that  
587 the rhythm of infant-directed communication provides a scaffolding mechanism for increasing the  
588 effectiveness of social information transfer, supporting infants' developing sensitivity to meaningful social  
589 signals by presenting those signals repeatedly and predictably. To test for further evidence of rhythm as  
590 the primary driver of infants' entrained eye-looking to caregivers' social-affective cueing, we also  
591 examined whether infants time-align their eye-looking to *any* moments of caregivers' wide-eyed positive  
592 affect (i.e., regardless of whether such expressiveness occurs on or off the beat). While caregivers  
593 increase wide-eyed positive affect in time with the beat, this visual cue also occurs at other times  
594 throughout their singing. At neither two nor six-months of age do infants significantly time-align their eye-  
595 looking to this social-communicative cue when it occurs irrespective of the rhythmic structure (**Figure S4**).  
596 (We highlight that these results focus on time-aligned change in levels of infant eye-looking in relation to a  
597 given caregiver cue, rather than infants' overall levels of eye-looking. Therefore, these results do not  
598 imply that infants don't look at caregivers' wide-eyed positive affect (they do); rather, these combined  
599 results demonstrate that the precise timing of infant-looking is time-aligned to the rhythmic structure more  
600 than to caregivers' affect presentation alone). Taken together, the analyses of caregiver visual cueing,  
601 both overall and in relation to rhythmic structure, indicates that although *what* a caregiver expresses in  
602 unimodal cueing is important, *when* and *how* that cueing occurs are more critical for the infant's response  
603 and receipt of information. Rhythm—to specify the “when” of predictable repetition—and rhythmic  
604 entrainment—to specify the “how” of complementary redundancy—seem ideally suited to the task of  
605 supporting successful social information transfer between caregiver and child.

606 Beyond infant-directed singing, visual communicative cues including eye contact, head  
607 movements, and facial expressiveness are important in other performative musical contexts (42, 50–53).  
608 Visual cues involving the eyebrows, lips, jaws, and head positioning covary with aspects of the musical  
609 structure (e.g., facial movements provide cues to pitch intervals, phrase closure, and amplitude of the  
610 vocal signal (54–56)) while also conveying associated emotions (e.g., eyebrow raises, forward head  
611 movements, and upward lip corner movements are associated with positive emotions during singing as

612 they are in speech, highlighting the cross-modal expression of cues during musical performances (42,  
613 57)). Indeed, visual displays are particularly salient for expressing emotions during singing (more so than  
614 isolated acoustic counterparts) (42, 43). Observers perceive greater communication and expressiveness  
615 from performers who use direct gaze, and this increases the observers' liking and emotional judgments of  
616 the performance (50). Some professional musicians are particularly well-known for their expressive visual  
617 cues during performances (e.g., (53)). It is possible that in musical performances more generally, the  
618 expressive visual cues will be time-aligned to the rhythmic structure as demonstrated in the infant-  
619 directed singing. At the same time, the use of such expressive cues and their timing will depend on  
620 multiple aspects related to the song requirements, performer attributes, and audience (e.g., (58, 59)).  
621 Regardless, it is remarkable that when engaging with infants, who have limited communicative skills and  
622 require external support to modulate their attention and arousal, caregivers adopt the highly expressive  
623 and engaging visual cues used in performative contexts.

624

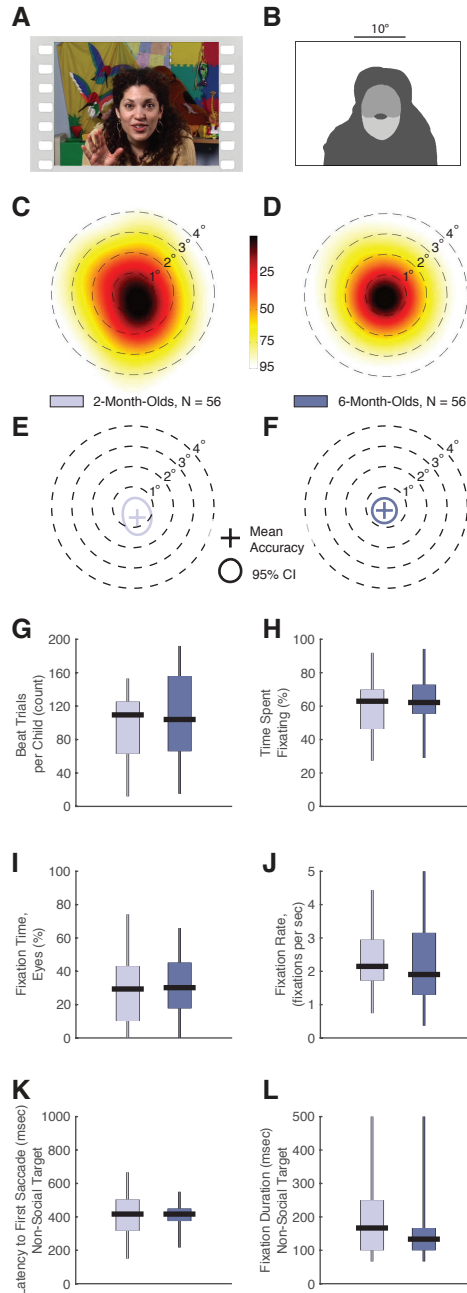

**Supplementary Figure S1 | Between-group controls for task completion and calibration accuracy.**

To test for group-wise differences in quality of data and task completion, we compared calibration accuracy, number of beat trials per child, fixation time, and fixation rate. **(A)** Example still image from infant-directed singing video stimuli. **(B)** Regions of interest, shaded to indicate eyes, mouth, body, and object regions, for the still image in (A) (as coded for all frames of all infant-directed singing videos). **(C, D)** Total variance in calibration accuracy for 2-month-olds (C) and 6-month-olds (D). Plots show kernel density estimates of the distribution of measured fixation locations relative to calibration accuracy verification targets. **(E, F)** Average calibration accuracy for 2-month-olds (E) and 6-month-olds (F). Crosses mark the location of mean calibration accuracy, while annuli mark 95% confidence intervals (CI). **(G)** Number of beat trials per child with valid data. **(H)** Percentage of total time spent fixating. **(I)** Percentage of time spent fixating on eyes. **(J)** Fixation rate. **(K)** Latency to first saccade when presented with a non-social target. **(L)** Fixation duration following first saccade when presented with a non-social target. In (K-L), we measured latency to first saccade after stimulus onset and the duration of first fixation as additional measures of oculomotor control. While 2- and 6-month-olds do not differ in mean or median latency to first saccade, they do differ in variance in saccade latency, with 2-month-olds being more variable than 6-month-olds ( $F_{1,107} = 15.9$ ,  $p < 0.0001$ ; Levene's test for equality of variance). In (G-L), boxplots span full range of data collected, with horizontal black lines marking medians, boxes spanning the 25th to 75th percentiles, and vertical lines extending from minimum to maximum values.



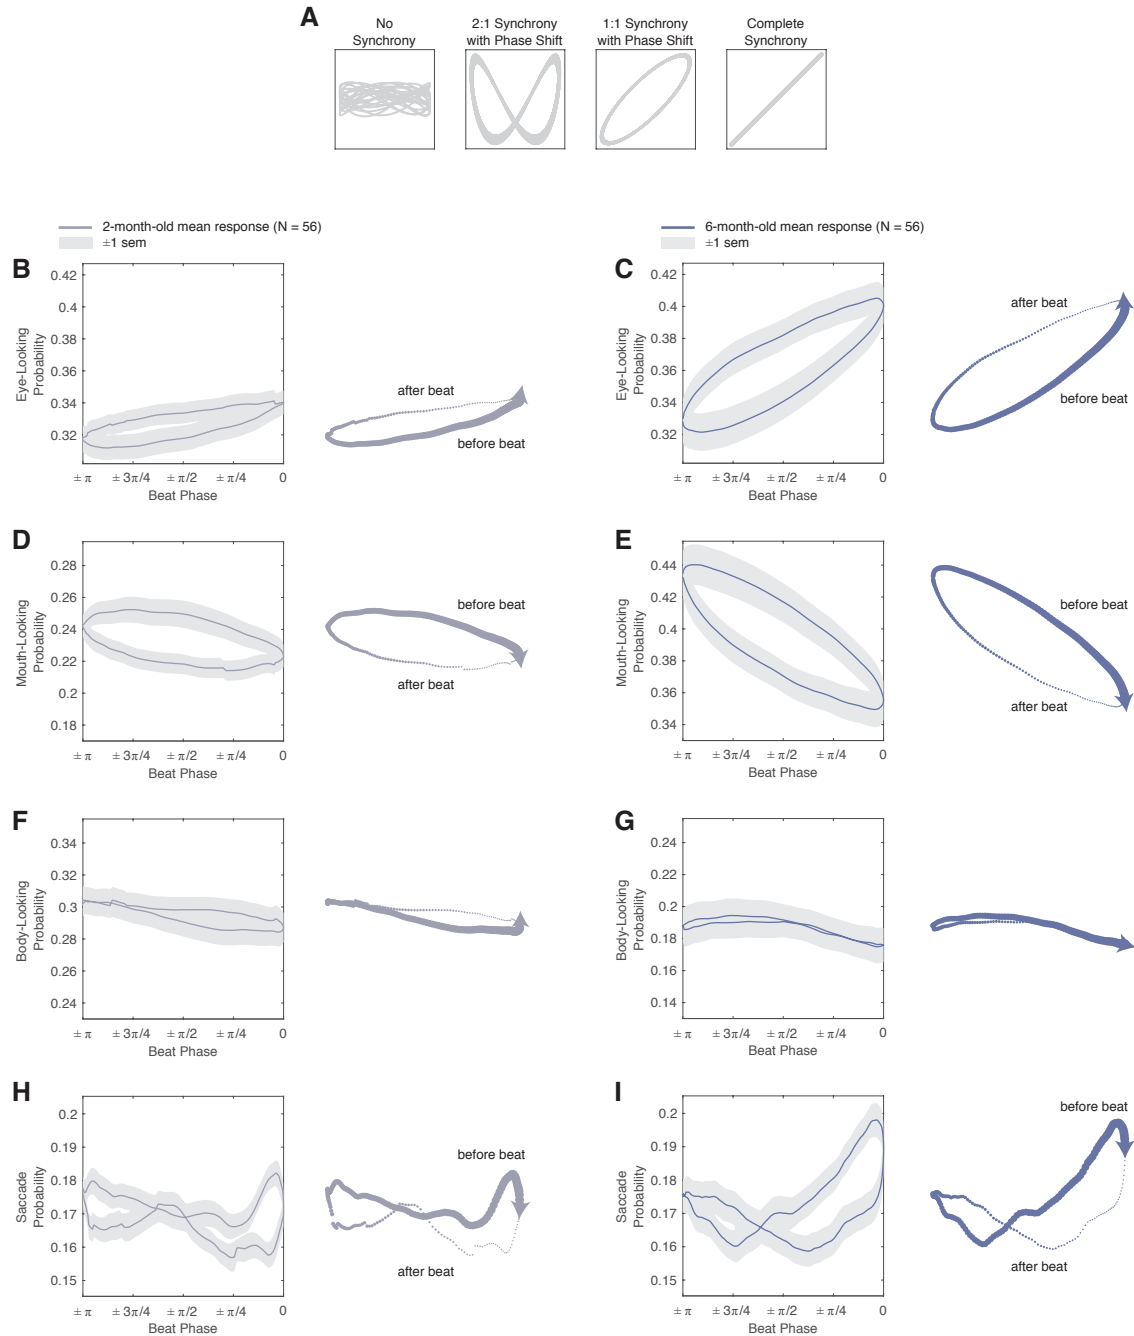

**Supplementary Figure S2 | Lissajous curves show synchronization of infant-looking and beat phase, with increased eye-looking sustained after the beat and increased saccades prior to the beat.** (A) Exemplar Lissajous curves demonstrating results for varying cases of synchrony between 2 time-varying signals: from no synchrony; to higher order synchrony with phase shift (here, 2 periods of output signal correspond to 1 period of modulating signal); to 1:1 phase synchrony (synchronized with 1:1 periods but with phase shift in timing); and complete synchrony (1:1 synchrony with 0 phase shift). (B, C) Lissajous curve for probability of infant eye-looking versus beat phase for (B) 2-month-old and (C) 6-month-old infants. Traces at right of each panel show direction of Lissajous curve travel over time. (D, E) Probability of infant mouth-looking versus beat phase for (D) 2-month-old and (E) 6-month-old infants. (F, G) Probability of infant body-looking versus beat phase for (F) 2-month-old and (G) 6-month-old infants. (H, I) Probability of infant saccades versus beat phase for (H) 2-month-old and (I) 6-month-old infants. In Lissajous curves in parts (B-I), mean looking probability is plotted in blue while gray areas denote  $\pm 1$  standard error of the mean (sem). In all traces, the arrowhead denotes mean response level at the beat (beat phase = 0), with trace thickness denoting direction of travel (thickening as time moves forward, resetting immediately after the beat). Y-axis ranges in parts (B) and (C), and in parts (H) and (I) are the same, whereas Y-axis spans are the same in parts (D) and (E), and (F) and (G), but their ranges differ. Mean probabilities of mouth and body-looking differ between groups; spans are matched for between-group comparison but ranges necessarily differ. Note that a Lissajous curve when no synchrony is present fills the plot area, and the average response probability is unchanged relative to the beat (a horizontal line, with no significant output signal change relative to beat phase, as observed for body-looking in (F) and (G)). Probability of eye- and mouth-looking in 6-month-old infants both show 1:1 synchrony with  $\sim\pi/5.5$  phase shift; however, mouth-looking is synchronous in anti-phase (maximally reduced after the beat). Saccades in 6-month-olds are synchronized at 2 saccade periods per 1 beat period, with maximum increase prior to (in anticipation of) the beat. When comparing synchronization of eye- and mouth-looking at 2-months (left columns) and 6-months (right columns), note greater magnitude of change in probability for 6-month-olds. Similarly, 6-month-olds exhibit greater increase in probability of saccades before the beat versus 2-month-olds.

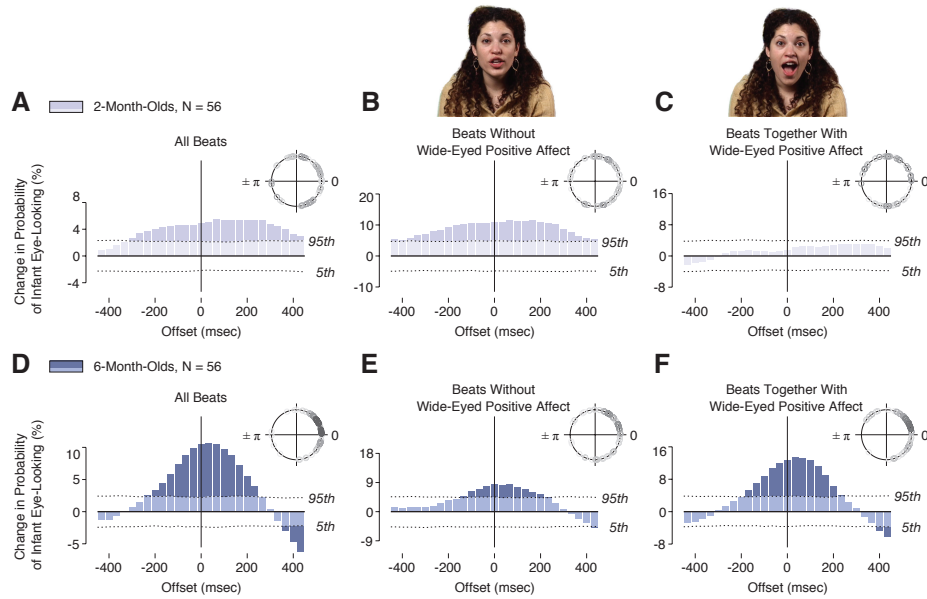

**Supplementary Figure S3 | Developmentally, the rhythm of infant-directed singing increases time-locked looking to relevant social information.** Caregiver singing stimuli were intended to create positive engagement with on-looking infants. At 2 months of age, infant eye-locking (**A**) increases at the beat (data repeated from Figure 2a) and (**B**) is driven more strongly by the beat alone than by (**C**) beats co-occurring with wide-eyed positive affect. By 6 months of age, however, infant eye-locking (**D**) is not only significantly increased at the beat (data repeated from Figure 2b), but (**E**) shows tight time-locking to the beat alone and (**F**) is strongly potentiated by beats co-occurring with wide-eyed positive affect. The developmental progression suggests that infant-looking becomes increasingly sensitive to added layers of social information that are supported by the rhythm of infant-directed communication. Dotted lines show 5th and 95th confidence intervals for change in eye-locking expected by chance (1-sided); plots are scaled to align by probability of observed results. Inset plots in the upper right of each panel show phase distributions of eye-locking for individual infants. Images above panels (B) and (C) are representative video stills for each analysis: moments when beats co-occur with wide-eyed positive affect, in (C) and (F), or when co-occurring predominantly with neutral facial affect, in (B) and (E).

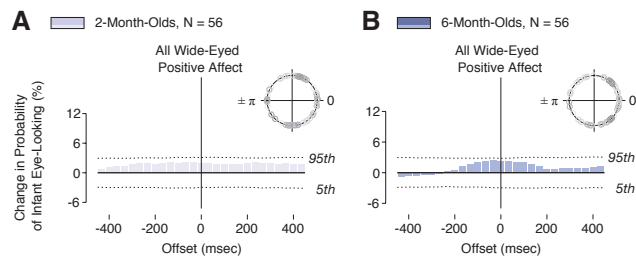

**Supplementary Figure S4 | Infant eye-looking is not time-aligned to all moments of wide-eyed positive affect.** During infant-directed singing, singers use positive, engaging facial expressions. However, in both 2-month-old (**A**) and 6-month-old (**B**) infants, eye-looking is not time-locked to all moments of such wide-eyed positive affect from the singer. Note, these findings do not imply that infants do not look at wide-eyed positive affect; rather, they indicate that the precise timing of infant-looking is not time-aligned to the caregiver affective facial expressions alone.

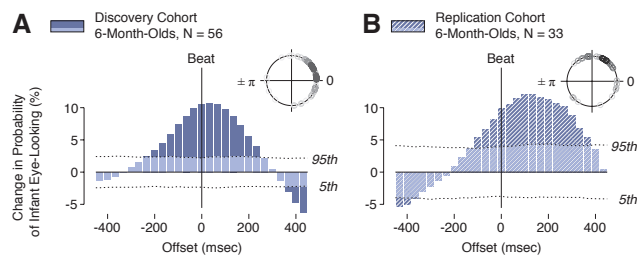

**Supplementary Figure S5 | Replication of Increased Eye-Looking, Synchronized to the Rhythm of Infant-Directed Singing, in an Independent Cohort of 6-Month-Olds.**

As in the discovery cohort (**A**) (results repeated from main text Figure 2b), in an independent cohort of 6-month-olds (**B**), we again observe significant change in infants' eye-looking, time-locked to the beat of infant-directed singing: infants increase their looking to singers' eyes, time-aligned to the beat and peaking approximately 100 msec after the beat. Dotted lines in both panels show 5th and 95th confidence intervals for change in eye-looking expected by chance (1-sided). Note that the difference in sample size in the replication cohort (N = 33 versus discovery cohort N = 56) is reflected in the confidence interval scaling (the absolute scale is the same while the size of the confidence interval is larger for the smaller replication sample). Inset plots in the upper right of each panel show phase distributions of eye-looking for individual infants.

632  
633

**Supplementary Table 1. Goodness of Fit for Phase Analyses**

|                                                   | <i>Beat</i>       | <i>High Frequency</i> | <i>High Amplitude</i> | <i>Beats w/o Wide-Eyed Positive Affect</i> | <i>Beats with Wide-Eyed Positive Affect</i> | <i>Replication</i> | <i>Reduced Predictability</i> |
|---------------------------------------------------|-------------------|-----------------------|-----------------------|--------------------------------------------|---------------------------------------------|--------------------|-------------------------------|
| <i>successfully fit<sup>1</sup>, 2 months</i>     | 100.0%<br>(56/56) | 96.4%<br>(54/56)      | 92.9%<br>(52/56)      | 100.0%<br>(56/56)                          | 100.0%<br>(56/56)                           | N/A                | N/A                           |
| <i>successfully fit<sup>1</sup>, 6 months</i>     | 98.2%<br>(55/56)  | 96.4%<br>(54/56)      | 98.2%<br>(55/56)      | 96.4%<br>(54/56)                           | 96.4%<br>(54/56)                            | 87.9%<br>(29/33)   | 90.9%<br>(30/33)              |
| <i>median<sup>2</sup> R<sup>2</sup>, 2 months</i> | 0.92              | 0.88                  | 0.82                  | 0.81                                       | 0.85                                        | N/A                | N/A                           |
| <i>median<sup>2</sup> R<sup>2</sup>, 6 months</i> | 0.96              | 0.91                  | 0.86                  | 0.89                                       | 0.94                                        | 0.96               | 0.94                          |

<sup>1</sup> = Percentage of children (and count) whose data were better fit with a cosine than simple linear function.  
<sup>2</sup> = Median individual goodness-of-fit statistic,  $R^2$ , across all children whose data were successfully fitted.

634

**SI REFERENCES**

- 636 1. A. Pikovsky, M. Rosenblum, J. Kurths, *Synchronization: A Universal Concept in Nonlinear*  
637 *Sciences* (Cambridge University Press, 2001).
- 638 2. S. Hoehl, M. Fairhurst, A. Schirmer, Interactional synchrony: signals, mechanisms and benefits.  
639 *Soc. Cogn. Affect. Neurosci.* **16**, 5–18 (2021).
- 640 3. R. Feldman, Parent-infant synchrony and the construction of shared timing; physiological  
641 precursors, developmental outcomes, and risk conditions. *J. Child Psychol. Psychiatry Allied*  
642 *Discip.* **48**, 329–354 (2007).
- 643 4. A. Sirota, *et al.*, Entrainment of Neocortical Neurons and Gamma Oscillations by the Hippocampal  
644 Theta Rhythm. *Neuron* **60**, 683–697 (2008).
- 645 5. T. Fuchikawa, A. Eban-Rothschild, M. Nagari, Y. Shemesh, G. Bloch, Potent social  
646 synchronization can override photic entrainment of circadian rhythms. *Nat. Commun.* **7**, 11662  
647 (2016).
- 648 6. S. H. Strogatz, D. M. Abrams, A. McRobie, B. Eckhardt, E. Ott, Crowd synchrony on the  
649 Millennium Bridge. *Nature* **438**, 43–44 (2005).
- 650 7. W. Jones, A. Klin, Attention to eyes is present but in decline in 2-6-month-old infants later  
651 diagnosed with autism. *Nature* **504**, 427–31 (2013).
- 652 8. J. N. Constantino, *et al.*, Infant viewing of social scenes is under genetic control and is atypical in  
653 autism. *Nature* **547**, 340–344 (2017).
- 654 9. H.-C. Hsu, A. Fogel, Stability and transitions in mother-infant face-to-face communication during  
655 the first 6 months: a microhistorical approach. *Dev. Psychol.* **39**, 1061–1082 (2003).
- 656 10. B. Beebe, *et al.*, A systems view of mother–infant face-to-face communication. *Dev. Psychol.* **52**,  
657 556–571 (2016).
- 658 11. B. Kralemann, *et al.*, In vivo cardiac phase response curve elucidates human respiratory heart rate  
659 variability. *Nat. Commun.* **4** (2013).
- 660 12. M. G. Rosenblum, A. S. Pikovsky, Detecting direction of coupling in interacting oscillators. *Phys.*  
661 *Rev. E. Stat. Nonlin. Soft Matter Phys.* **64**, 4 (2001).
- 662 13. B. Kralemann, L. Cimponeriu, M. Rosenblum, A. Pikovsky, R. Mrowka, Phase dynamics of  
663 coupled oscillators reconstructed from data. *Phys. Rev. E. Stat. Nonlin. Soft Matter Phys.* **77**  
664 (2008).
- 665 14. R. J. Leigh, D. S. Zee, *The Neurology of Eye Movements*, 4th Ed. (Oxford University Press, USA,  
666 2006).
- 667 15. S. Shultz, A. Klin, W. Jones, Inhibition of eye blinking reveals subjective perceptions of stimulus  
668 salience. *Proc. Natl. Acad. Sci. U. S. A.* **108**, 21270–21275 (2011).
- 669 16. L. J. Trainor, E. D. Clark, A. Huntley, B. A. Adams, The acoustic basis of preferences for infant-  
670 directed singing. *Infant Behav. Dev.* **20**, 383–396 (1997).
- 671 17. T. Nakata, S. E. Trehub, Expressive timing and dynamics in infant-directed and non-infant-directed  
672 singing. *Psychomusicology Music. Mind Brain* **21**, 45–53 (2011).
- 673 18. A. D. Patel, J. R. Iversen, J. C. Rosenberg, Comparing the rhythm and melody of speech and  
674 music: The case of British English and French. *Acoust. Soc. Am.* **19**, 3034–3047 (2006).
- 675 19. G. E. Peterson, I. Lehiste, Duration of Syllable Nuclei in English. *J. Acoust. Soc. Am.* **32**, 693–703  
676 (1960).
- 677 20. P. Boersma, D. Weenink, Praat: doing phonetics by computer [Computer program] (2016).
- 678 21. O. Lartillot, “MIRtoolbox 1.7 User’ s Manual” (2017).
- 679 22. A. Fernald, P. Kuhl, Acoustic determinants of infant preference for motherese speech. *Infant*  
680 *Behav. Dev.* **10**, 279–293 (1987).
- 681 23. S. E. Trehub, J. Plantinga, F. A. Russo, Maternal Vocal Interactions with Infants: Reciprocal Visual  
682 Influences. *Soc. Dev.* **25**, 665–683 (2016).
- 683 24. L. K. Cirelli, Z. B. Jurewicz, S. E. Trehub, Effects of Maternal Singing Style on Mother–Infant  
684 Arousal and Behavior. *J. Cogn. Neurosci.*, 1–8 (2019).
- 685 25. F. De la Torre, *et al.*, Facial expression analysis. *IEEE Int. Conf. Autom. Face Gesture Recognit.*  
686 (2015).
- 687 26. X. Xiong, F. De La Torre, Supervised descent method and its applications to face alignment in  
688 *Proceedings of the IEEE Computer Society Conference on Computer Vision and Pattern*  
689 *Recognition*, (2013) <https://doi.org/10.1109/CVPR.2013.75>.

- 690 27. D. N. Stern, "Mother and infant at play: The dyadic interaction involving facial, vocal, and gaze  
691 behaviors." in *The Effect of the Infant on Its Caregivers*, M. Lewis, L. A. Rosenblum, Eds. (Wiley-  
692 Interscience, 1974), pp. 187–213.
- 693 28. S. C. F. Chong, J. F. Werker, J. A. Russell, J. M. Carroll, Infant and Child Development Three  
694 Facial Expressions Mothers Direct to Their Infants. *Child Dev* **12**, 211–232 (2003).
- 695 29. D. N. Stern, *The First Relationship: Infant and Mother* (Harvard University Press, 1977).
- 696 30. L. B. Adamson, *Communication Development During Infancy* (Routledge, 2018).
- 697 31. P. Ekman, H. Oster, Facial expressions of emotion. *Annu. Rev. Psychol.* **30**, 527–554 (1979).
- 698 32. J. H. Zar, *Biostatistical Analysis*, 5th Ed. (Prentice-Hall/Pearson, 2010).
- 699 33. P. Berens, CircStat : A MATLAB Toolbox for Circular Statistics . *J. Stat. Softw.* **31**, 1–21 (2009).
- 700 34. S. R. Jammalamadaka, A. SenGupta, *Topics in Circular Statistics* (WORLD SCIENTIFIC, 2001).
- 701 35. J. Tchorz, B. Kollmeier, Estimation of the signal-to-noise ratio with amplitude modulation  
702 spectrograms. *Speech Commun.* **38**, 1–17 (2002).
- 703 36. A. Fernald, T. Simon, Expanded intonation contours in mothers' speech to newborns. *Dev.*  
704 *Psychol.* **20**, 104–113 (1984).
- 705 37. L. Trainor, C. Zacharias, Infants prefer higher-pitched singing. *Infant Behav. Dev.* **21**, 799–805  
706 (1998).
- 707 38. C. D. Tsang, S. Falk, A. Hessel, Infants Prefer Infant-Directed Song Over Speech. *Child Dev.* **88**,  
708 1207–1215 (2017).
- 709 39. S. Falk, N. Audibert, Acoustic signatures of communicative dimensions in codified mother-infant  
710 interactions. *J. Acoust. Soc. Am.* **150**, 4429–4437 (2021).
- 711 40. A. Fernald, C. Mazzie, Prosody and focus in speech to infants and adults. *Dev. Psychol.* **27**, 209–  
712 221 (1991).
- 713 41. J. Colombo, J. Frick, J. Ryther, J. Coldren, D. Mitchell, Infants' detection of analogs of "motherese"  
714 in noise. *Merrill. Palmer. Q.* **41**, 104–113 (1995).
- 715 42. S. R. Livingstone, W. F. Thompson, M. M. Wanderley, C. Palmer, Common cues to emotion in the  
716 dynamic facial expressions of speech and song. *Q. J. Exp. Psychol.* **68**, 952–970 (2015).
- 717 43. E. B. Lange, J. Funderich, H. Grimm, Multisensory integration of musical emotion perception in  
718 singing. *Psychol. Res.* (2022) <https://doi.org/10.1007/S00426-021-01637-9>.
- 719 44. E. Bigand, Perceiving musical stability: the effect of tonal structure, rhythm, and musical expertise.  
720 *J. Exp. Psychol. Hum. Percept. Perform.* **23**, 808–822 (1997).
- 721 45. E. Bigand, M. Pineau, Context effects on melody recognition: A dynamic interpretation. *Curr.*  
722 *Psychol. Cogn.* **15**, 121–134 (1996).
- 723 46. M. R. Jones, M. Boltz, Dynamic Attending and Responses to Time. *Psychol. Rev.* **96**, 459–491  
724 (1989).
- 725 47. M. R. Jones, "Dynamics of musical patterns: How do melody and rhythm fit together?" in  
726 *Psychology and Music: The Understanding of Melody and Rhythm*, 1st Ed., W. J. Dowling, T. J.  
727 Tighe, Eds. (Lawrence Erlbaum and Associates, Inc., 1993), pp. 67–92.
- 728 48. D. J. Lewkowicz, Learning and Discrimination of Audiovisual Events in Human Infants: The  
729 Hierarchical Relation Between Intersensory Temporal Synchrony and Rhythmic Pattern Cues.  
730 *Dev. Psychol.* **39**, 795–804 (2003).
- 731 49. L. E. Bahrick, R. Lickliter, Intersensory redundancy guides attentional selectivity and perceptual  
732 learning in infancy. *Dev. Psychol.* **36**, 190–201 (2000).
- 733 50. A. Antonietti, D. Cocomazzi, P. Iannello, Looking at the Audience Improves Music Appreciation. *J.*  
734 *Nonverbal Behav.* **33**, 89–106 (2009).
- 735 51. E. Coutinho, K. Scherer, The effect of context and audio-visual modality on emotions elicited by a  
736 musical performance. *Psychol. Music* **45**, 550–569 (2017).
- 737 52. S. Livingstone, W. Thompson, F. Russo, Facial expressions and emotional singing: A study of  
738 perception and production with motion capture and electromyography. *Music Percept.* **26**, 475–  
739 488 (2009).
- 740 53. W. F. Thompson, P. Graham, F. A. Russo, Seeing music performance: Visual influences on  
741 perception and experience. *Semiotica* **156**, 203–227 (2005).
- 742 54. D. K. Ceaser, W. F. Thompson, F. Russo, Expressing tonal closure in music performance:  
743 auditory and visual cues. *Can. Acoust. - Acoust. Can.* **37**, 29–34 (2009).
- 744 55. D. Huron, S. Dahl, R. Johnson, Facial expression and vocal pitch height: Evidence of an  
745 intermodal association. *Empir. Musicol. Rev.* **4**, 93–100 (2009).

- 746 56. W. F. Thompson, F. A. Russo, Facing the Music. *Psychol. Sci.* **18**, 756–757 (2007).  
747 57. S. R. Livingstone, C. Palmer, Head movements encode emotions during speech and song.  
748 *Emotion* **16**, 365–380 (2016).  
749 58. J. Davidson, A. Coulam, “Exploring jazz and classical solo singing performance behaviours: A  
750 preliminary step towards understanding performer creativity” in *Musical Creativity*, (Psychology  
751 Press, 2006), pp. 197–215.  
752 59. J. W. Davidson, The Activity and Artistry of Solo Vocal Performance: Insights from Investigative  
753 Observations and Interviews with Western Classical Singers. *Music. Sci.* **11**, 109–140 (2007).  
754
